# Supplementary material for: Identification of the early cretaceous granitic pluton and tectonic implications in the middle gangdese belt, southern tibet
Source: Frontiers journal article supplement (doi:10.3389/feart.2022.979313), 2022-09-07
Supplement: Table_1.XLS [file Table_1.XLS]

## Sheet: Sheet1
Supplementary Table1 Zircon LA-ICP-MS U-Pb dating results of the granitic pluton in the study area
spot number	Th232（×10-6）	U238（×10-6）	Pb206（×10-6）	Pb207/U235		Pb206/U238		Pb206/U238
				Ratio	1σ	Ratio	1σ	Age	1σ
21QSC01-1-01	104.75	129.02	10.64	0.1221	0.00563	0.01853	0.00027	118.4	1.7
21QSC01-1-02	260.39	202.27	16.4	0.12378	0.00781	0.01856	0.00032	118.5	2.03
21QSC01-1-03	72.98	275.46	16.44	0.09441	0.00481	0.01233	0.0002	79	1.25
21QSC01-1-04	575.63	366.1	30.63	0.1327	0.00574	0.01963	0.00028	125.3	1.77
21QSC01-1-05	95.59	72.21	5.94	0.13229	0.01661	0.01875	0.00056	119.7	3.57
21QSC01-1-06	668.06	203.75	16.02	0.09642	0.00547	0.01471	0.00023	94.1	1.49
21QSC01-1-07	328.9	216.55	16.37	0.09974	0.00935	0.01482	0.00035	94.8	2.2
21QSC01-1-08	231.81	156.62	13.02	0.12516	0.00655	0.01861	0.00029	118.8	1.83
21QSC01-1-09	144.35	137.21	10.21	0.12419	0.00964	0.01859	0.00035	118.8	2.22
21QSC01-1-10	104.33	106.92	8.73	0.12516	0.00675	0.01849	0.00029	118.1	1.84
21QSC01-1-11	235.26	151.04	10.93	0.09595	0.00552	0.01484	0.00024	94.9	1.54
21QSC01-1-12	40.63	44.49	3.54	0.12398	0.02614	0.01844	0.00081	117.8	5.14
21QSC01-1-13	76.78	56.99	4.8	0.12912	0.02034	0.01947	0.00069	124.3	4.39
21QSC01-1-14	589.66	439.1	35.91	0.12524	0.00627	0.01849	0.00028	118.1	1.77
21QSC01-1-15	466.35	240.48	20.08	0.12496	0.00595	0.0185	0.00027	118.2	1.73
21QSC01-1-16	87.28	99.22	8.48	0.11995	0.00892	0.0186	0.00035	118.8	2.2
21QSC01-1-17	240.89	610.67	151.55	0.40666	0.00625	0.05567	0.00061	349.3	3.73
21QSC01-1-18	161.47	106.32	9.19	0.12933	0.01837	0.01947	0.00064	124.3	4.03
21QSC01-1-19	174.59	146.16	12.99	0.13087	0.00569	0.01952	0.00027	124.6	1.71
21QSC01-1-20	335.48	198.19	16.43	0.12319	0.00536	0.01852	0.00026	118.3	1.63
21QSC01-1-21	279.08	399.91	32.98	0.12605	0.00368	0.01848	0.00023	118	1.43
21QSC01-1-22	95.12	88.62	7.22	0.1246	0.00779	0.01862	0.0003	118.9	1.93
21QSC01-1-23	99	112.03	9.31	0.12538	0.00777	0.01851	0.00032	118.3	2.01
21QSC01-1-24	134.71	164.64	14.83	0.132	0.00557	0.01968	0.00027	125.6	1.71
21QSC01-1-25	102.68	104.44	8.87	0.12476	0.00637	0.01848	0.00028	118	1.76
21QSC01-1-26	306	216.99	19.22	0.1343	0.00536	0.01969	0.00027	125.7	1.69
21QSC01-1-27	108.56	103.73	8.73	0.1282	0.0108	0.01945	0.00039	124.2	2.44
21QSC01-1-28	115.87	104.8	9.49	0.12696	0.00853	0.01908	0.00034	121.8	2.17
21QSC01-1-29	276.78	170.13	13.81	0.11887	0.0076	0.01784	0.00031	114	1.99
21QSC01-1-30	168.13	128.54	10.61	0.1059	0.00773	0.01583	0.00031	101.2	1.94
21QSC02-1-01	475.84	289.02	22.33	0.12328	0.0047	0.01854	0.00042	118.4	2.65
21QSC02-1-02	372.83	203.72	15.89	0.1246	0.00536	0.01863	0.00043	119	2.71
21QSC02-1-03	238.12	206.88	16.1	0.12042	0.0053	0.01809	0.00042	115.6	2.64
21QSC02-1-04	295.45	776.76	666.74	2.50534	0.05772	0.21831	0.00472	1272.9	24.98
21QSC02-1-05	68.85	83.6	6.85	0.13165	0.00935	0.01963	0.00051	125.3	3.23
21QSC02-1-06	1276.65	596.61	45.59	0.11573	0.00459	0.01735	0.00039	110.9	2.49
21QSC02-1-07	291.28	441.5	32.48	0.12132	0.00536	0.01804	0.00041	115.2	2.62
21QSC02-1-08	494.48	417.33	33.31	0.12545	0.00441	0.01885	0.00042	120.4	2.64
21QSC02-1-09	596.04	369.28	28.12	0.11108	0.00502	0.01647	0.00038	105.3	2.41
21QSC02-1-10	82.75	79.25	6.32	0.12962	0.01233	0.01969	0.00058	125.7	3.68
21QSC02-1-11	214.26	148.8	11.29	0.11988	0.00898	0.01808	0.00048	115.5	3.03
21QSC02-1-12	128.39	104.23	8.45	0.13163	0.01111	0.01973	0.00055	125.9	3.45
21QSC02-1-13	279.52	225.86	17.87	0.12431	0.00532	0.01854	0.00042	118.4	2.66
21QSC02-1-14	169.4	130.68	9.63	0.11399	0.00694	0.01724	0.00042	110.2	2.68
21QSC02-1-15	485.84	307.44	23.58	0.11363	0.00853	0.01733	0.00046	110.8	2.9
21QSC02-1-16	99.21	140.39	12.15	0.12993	0.00889	0.0197	0.00051	125.7	3.19
21QSC02-1-17	145.55	122.3	10.32	0.1192	0.00658	0.01811	0.00043	115.7	2.73
21QSC02-1-18	195.89	232.34	20.24	0.12201	0.00487	0.01805	0.0004	115.3	2.56
21QSC02-1-19	165.15	101.32	7.11	0.10008	0.00995	0.0149	0.00045	95.3	2.84
21QSC02-1-20	153.66	106.65	8.23	0.12214	0.01576	0.01861	0.00065	118.9	4.09
YK3-3-1	436.452	843.94	0	0.0504415	0.00173329	0.00777341	7.94799e-05	49.9168	0.509122
YK3-3-2	425.509	260.57	46.8474	0.284674	0.0145112	0.019134	0.000215316	122.181	1.36356
YK3-3-3	500.637	307.256	5.71892	0.137091	0.00883694	0.0191647	0.000288741	122.375	1.82754
YK3-3-4	340.29	375.107	2.46892	0.118677	0.00374277	0.0178926	0.000232994	114.323	1.47686
YK3-3-5	425.159	277.007	0	0.121415	0.00488767	0.0177078	0.000280534	113.153	1.77802
YK3-3-6	237.635	251.482	6.55335	0.119585	0.00544321	0.0178653	0.000245646	114.15	1.55696
YK3-3-7	116.065	117.924	2.45951	0.118999	0.00736855	0.0177396	0.000272975	113.354	1.73012
YK3-3-8	219.041	203.463	9.1664	0.111463	0.00429961	0.0166469	0.000256485	106.429	1.62735
YK3-3-9	464.307	344.273	8.84319	0.115289	0.00466221	0.0171963	0.000288156	109.912	1.82713
YK3-3-10	250.112	253.246	21.5084	0.169912	0.00678279	0.0168741	0.000218558	107.87	1.38676
YK3-3-11	134.486	109.621	0	0.133725	0.0135242	0.0191682	0.000375976	122.397	2.37903
YK3-3-12	246.542	196.167	0	0.115635	0.00729288	0.0172539	0.00028479	110.277	1.80572
YK3-3-13	72.8874	93.2465	2.88409	0.11477	0.00845563	0.0173903	0.000383086	111.142	2.42806
YK3-3-14	227.825	181.959	2.50309	0.118053	0.0110537	0.0172647	0.000437376	110.345	2.7723
YK3-3-15	180.912	137.43	2.14346	0.119491	0.00572475	0.0178388	0.000240234	113.983	1.52275
YK3-3-16	178.686	198.451	6.91614	0.126832	0.00545833	0.0191109	0.000314651	122.035	1.99142
YK3-3-17	283.802	203.847	7.12385	0.119545	0.00582535	0.0180022	0.000236556	115.018	1.49926
YK3-3-18	107.992	109.213	0	0.12014	0.00666535	0.0181869	0.000318352	116.187	2.01655
YK3-3-19	458.309	383.948	5.80438	0.111164	0.0042989	0.0166518	0.000255728	106.461	1.62255
YK3-3-20	187.759	163.828	0	0.110439	0.00544796	0.0165205	0.000303408	105.628	1.92495
YK3-3-21	362.156	216.134	4.89932	0.123119	0.00491525	0.0183054	0.000206925	116.937	1.31147
YK3-3-22	373.735	274.853	5.10235	0.113402	0.00428686	0.0169615	0.000233892	108.424	1.48377
YK3-3-23	252.972	392.724	18.7283	0.199423	0.00891234	0.0173643	0.00022929	110.977	1.4541
YK3-3-24	188.745	146.062	8.4438	0.127491	0.00788235	0.0185606	0.000270729	118.552	1.71462
YK3-3-25	418.571	320.457	1616.56	123.891	22.2552	1.14361	0.218694	4915.32	657.678
YK3-3-26	117.543	109.769	56.3314	0.614616	0.0511468	0.0218028	0.000617355	139.039	3.89553
YK3-3-27	177.527	170.787	8.40169	0.133905	0.00929397	0.0193282	0.000512853	123.409	3.24406
YK3-3-28	254.329	211.843	0	0.125935	0.00671976	0.0172682	0.000429453	110.368	2.72209
YK3-3-29	676.574	525.449	0	0.115024	0.0061132	0.0156519	0.000332838	100.117	2.11324
YK3-3-30	168.493	190.376	4.83643	0.135031	0.0159824	0.0182634	0.000332183	116.671	2.10392
YK3-3-31	537.816	290.844	0	0.113602	0.00519265	0.0167598	0.000259558	107.145	1.64665
YK3-3-32	199.699	209.092	11.7866	0.15542	0.00941763	0.0174567	0.000278702	111.562	1.76683
YK3-3-33	187.278	165.774	0	0.127053	0.00581404	0.0189769	0.000272739	121.187	1.72669
YK3-3-34	119.575	140.218	8.34846	0.112633	0.00506701	0.0170248	0.000294328	108.825	1.86652
YK3-3-35	193.781	169.146	5.76914	0.116845	0.00781925	0.017408	0.000370437	111.254	2.3479
YK3-3-36	112.299	137.063	144.428	2.21147	0.182357	0.0361608	0.00178217	228.992	11.0884
YK3-3-37	480.488	301.846	6.33062	0.128802	0.00575559	0.0187634	0.000227685	119.836	1.44217
YK3-3-38	203.008	188.848	0	0.114641	0.00694884	0.0172721	0.000278319	110.393	1.7647
YK3-3-39	162.843	178.413	165.969	1.30847	0.109299	0.0248478	0.00106854	158.221	6.72181
YK3-3-40	71.652	87.8733	12.4256	0.12899	0.0127677	0.0183937	0.000429096	117.496	2.71691
YK3-3-41	848.127	1009.66	5.4387	0.109585	0.00268306	0.0140481	0.000154594	89.9297	0.983971
YK3-3-42	495.381	348.286	11.1465	0.114864	0.00399835	0.0167959	0.000299611	107.374	1.9004
YK3-3-43	430.597	240.196	18.0287	0.11116	0.00526666	0.016869	0.000316323	107.838	2.00617
YK3-3-44	242.413	167.989	0	0.112419	0.00598615	0.0168068	0.000271125	107.443	1.71987
YK3-3-45	146.306	121.442	639.87	13.5131	0.954057	0.130604	0.00811632	791.313	46.2791
YK3-3-46	122.563	115.276	1577.52	89.7789	43.8954	0.91834	0.396709	4199.58	1333.11
YK3-3-47	373.906	311.796	0	0.131141	0.00748893	0.0195097	0.000278437	124.557	1.76185
YK3-3-48	230.398	168.062	0	0.130195	0.00877603	0.0196421	0.000314585	125.394	1.99003
YK3-3-49	284.305	266.019	16.7165	0.130284	0.00956615	0.0194491	0.000393328	124.173	2.48809
YK3-3-50	173.931	159.028	4.87072	0.116485	0.00785654	0.0174567	0.000342006	111.562	2.16772
