# Supplementary material for: Identification of the early cretaceous granitic pluton and tectonic implications in the middle gangdese belt, southern tibet
Source: Frontiers journal article supplement (doi:10.3389/feart.2022.979313), 2022-09-07
Supplement: Table_3.XLS [file Table_3.XLS]

## Sheet: Sheet1
Supplementary Table3 Major and trace whole-rock element data (major elements: wt%; Trace elements: ppm)
sample	21QSC01-4	21QSC01-5	21QSC01-6	21QSC01-7	21QSC01-9	21QSC01-10	21QSC02-4	21QSC02-5
SiO2	66.62	66.45	67.915	65.98	66.35	65.995	67.914	66.918
TiO2	0.45	0.45	0.461	0.46	0.437	0.445	0.445	0.44
Al2O3	14.71	14.58	14.881	14.56	14.517	14.357	14.543	14.315
TFe/TFe2O3	3.02	1.72	2.905	2.53	2.915	2.614	2.355	2.497
MnO	0.09	0.07	0.083	0.08	0.091	0.084	0.064	0.089
MgO	0.3	0.32	0.321	0.35	0.331	0.338	0.319	0.31
CaO	4.24	4.8	3.28	4.53	4.311	6.1	3.982	5.822
Na2O	3.56	2.38	3.314	2.98	3.714	0.514	3.331	0.544
K2O	1.81	2.22	1.941	2	1.771	1.595	1.93	1.636
P2O5	0.17	0.15	0.158	0.15	0.16	0.146	0.154	0.143
Ig/LOI	5.03	6.84	4.604	6.37	5.401	7.894	5.301	7.701
Li	27.2889	58.5079	29.6266	35.5969	26.4734	32.2581	32.9371	35.1936
Be	1.22403	1.49956	1.37277	1.37608	1.35231	1.799	1.44002	1.52856
Sc	4.5687	4.56573	4.45288	4.57248	4.8954	4.91975	5.14518	4.99601
V	27.4617	27.2804	28.4756	27.529	25.8487	24.5674	26.6004	25.9505
Cr	1.88041	1.44305	2.0037	2.35695	1.38905	0.983206	1.75166	1.17747
Co	2.03513	3.04664	2.62221	2.41883	2.0882	2.24018	2.28213	2.42211
Ni	1.27281	1.2056	1.44488	1.51552	1.13583	1.33986	1.09118	1.33854
Cu	2.74255	3.31856	3.47105	3.42063	2.2189	1.09524	2.08068	1.19307
Zn	27.6999	59.6711	25.8474	24.3495	28.6293	15.9143	23.8468	14.675
Ga	15.8578	15.8393	15.9624	16.1541	15.2227	14.9781	15.4572	15.7428
Rb	47.0828	55.2616	53.0356	57.0625	46.2246	39.8448	53.071	43.0759
Sr	119.55	156.625	129.551	135.855	123.801	151.354	135.234	132.385
Y	22.7401	23.2574	22.9266	22.8376	22.2891	21.6893	22.9162	22.2954
Zr	208.875	217.806	214.802	209.682	197.865	205.405	212.689	215.507
Nb	12.4385	12.4251	12.6847	12.5831	12.1096	12.0327	12.8013	12.4624
Sn	1.0738	1.06181	1.03508	1.11701	1.07954	1.21856	1.1489	1.23623
Cs	2.5054	3.40458	4.29852	4.59967	2.44564	1.72695	3.35684	1.98558
Ba	193.726	222.829	186.495	195.474	180.466	538.171	187.43	571.872
La	27.8141	27.5706	27.7727	27.8654	27.0947	26.8572	28.1001	28.0544
Ce	53.7001	53.562	54.4118	54.4511	52.7551	52.3741	54.7808	54.6004
Pr	5.99834	5.95353	5.91909	5.97582	5.97048	5.85504	6.2477	6.11623
Nd	22.1407	22.7624	22.3732	22.7711	21.7566	21.6622	22.6013	22.7186
Sm	4.19928	4.40363	4.32463	4.33365	4.25911	4.14202	4.44709	4.3085
Eu	1.06891	1.05458	1.07696	1.10865	1.06104	0.957206	1.03576	0.979487
Gd	3.70725	3.79363	3.71279	3.71608	3.71144	3.61459	3.72766	3.63797
Tb	0.575816	0.590697	0.576092	0.574841	0.584831	0.582008	0.611713	0.611358
Dy	3.5543	3.4567	3.70211	3.77	3.34209	3.3661	3.52555	3.4412
Ho	0.744932	0.754868	0.767653	0.745063	0.715389	0.728513	0.767132	0.74804
Er	2.2384	2.19957	2.18037	2.27814	2.09579	2.14888	2.24783	2.16749
Tm	0.357086	0.361057	0.36087	0.36389	0.333384	0.340703	0.35801	0.346937
Yb	2.43601	2.48201	2.51225	2.47378	2.30531	2.33211	2.42693	2.36459
Lu	0.377897	0.384943	0.388348	0.383169	0.368879	0.368672	0.383654	0.383867
Hf	5.02092	5.02846	5.12188	5.17548	4.58999	4.7824	5.22804	4.95962
Ta	0.84861	0.838716	0.866415	0.836005	0.805582	0.757014	0.84658	0.857795
Tl	0.275225	0.348124	0.32798	0.336271	0.291438	0.220138	0.3216	0.229883
Pb	3.07561	4.10304	2.96363	2.8322	2.97763	3.58559	2.83408	3.86655
Th	7.72324	7.68638	7.86809	7.86759	7.45645	7.28302	8.01288	7.77655
U	1.95885	1.81532	1.93602	1.92939	1.76338	1.70153	1.87795	1.71965
A/CNK	0.946366	0.96766	1.09965	0.950152	0.913937	1.04895	0.980831	1.07838
A/NK	1.87067	2.28642	1.95699	2.04495	1.79808	5.49239	1.90858	5.28464
A.R.	1.79087	1.62246	1.81435	1.70588	1.82215	1.22989	1.79328	1.2428
Mg#	16.757	26.8818	18.2339	21.5154	18.5219	20.674	21.5227	19.705
Ce/Nd	2.4254	2.35309	2.43201	2.39124	2.42478	2.41777	2.42379	2.40334
Sr/Y	5.25725	6.73442	5.65069	5.94875	5.55431	6.9783	5.90125	5.93778
Notes: A.R. = (Al2O3+ CaO + Na2O + K2O)/(Al2O3+ CaO − Na2O − K2O)
