# Supplementary material for: Identification of the early cretaceous granitic pluton and tectonic implications in the middle gangdese belt, southern tibet
Source: Frontiers journal article supplement (doi:10.3389/feart.2022.979313), 2022-09-07
Supplement: Table_4.XLS [file Table_4.XLS]

## Sheet: Sheet1
Supplementary Table4 TIMA surface scanning results of the granitc pluton in the study area
sample	21QSC02-2	21QSC01-2	21QSC01-3
Mass % of phase [%]
Quartz	50.2121	42.1136	43.6274
Albite	0.0193312	25.1421	23.3778
Muscovite	15.3668	15.7475	16.7243
Calcite	13.8588	9.23111	9.10004
Aluminosilicate	18.5607	1.79261	1.76944
Chlorite-(Fe)	0.795415	0.795619	0.804636
Hematite/Magnetite	0.448531	0.529719	0.506914
Rutile	0.425246	0.461329	0.473691
Apatite	0.232535	0.270478	0.270898
Oxide-(Fe,Mn)	0.000725943	0.0701433	0.000172319
Ilmenite	0.00500463	0.0397555	0.0242435
Zircon	0.0321786	0.0103724	0.0109
Manganite	0.000828357	0.0335177	0.000228746
Kaolinite	0.00381732	0.00725621	0.0137651
Monazite	0.00175096	0.0026106	0.00312892
[Unclassified]	0.0362254	3.75231	3.29246
Volume % of phase [%]
Quartz	51.0654	42.8985	44.4272
Albite	0.0196597	25.6107	23.8064
Muscovite	14.7816	15.1724	16.1086
Calcite	13.6263	9.09088	8.95911
Aluminosilicate	18.9484	1.83302	1.80878
Chlorite-(Fe)	0.799774	0.801273	0.81011
Rutile	0.266606	0.289696	0.29737
Hematite/Magnetite	0.232967	0.275581	0.263638
Apatite	0.196696	0.229162	0.229449
Ilmenite	0.0028252	0.022479	0.0137039
Oxide-(Fe,Mn)	0.00036496	0.0353209	8.67457e-05
Zircon	0.0184388	0.00595315	0.00625411
Kaolinite	0.00391205	0.00744831	0.0141253
Manganite	0.000426096	0.0172689	0.000117819
Monazite	0.000905917	0.00135286	0.00162098
[Unclassified]	0.0357494	3.70899	3.25347
