# Supplementary material for: Identification of the early cretaceous granitic pluton and tectonic implications in the middle gangdese belt, southern tibet
Source: Frontiers journal article supplement (doi:10.3389/feart.2022.979313), 2022-09-07
Supplement: Table_5.XLS [file Table_5.XLS]

## Sheet: Sheet1
Supplementary Table5 Trace element compositions (ppm) of the studied zircons
sample	La	Ce	Pr	Nd	Sm	Eu	Gd	Tb	Dy	Ho	Er	Tm	Yb	Lu	Hf	Th	U	Ti	DCe3+	R2(DCe3+)	DCe4+	R2(DCe4+)	Ce4+(ppm) in zircon	Ce3+(ppm) in zircon	Ce/Nd	T(°C)	δEu	Ce4+/Ce3+
21QSC01-1-01	0.0127	10.47	0.0581	0.848	1.76	0.713	9.23	3.51	45.48	18.76	96.85	23.96	271.07	61.79	8620.43	104.75	129.02	3.53	0.00136546	0.999474	33.6818	0.125925	10.3984	0.0716135	12.3467	685.405	0.540824	145.346
21QSC01-1-02	31.92	104.62	10.04	52.04	23.88	6.44	78.1	25.65	289.33	107.6	479.77	99.81	956.06	187.02	6946.09	260.39	202.27	7.7	0.16199	0.982115	57.4141	0.0135192	96.346	8.27396	2.01038	754.924	0.455897	12.2423
21QSC01-1-04	0.168	72.61	1.24	20.95	36.76	9.46	166.58	57.28	671.36	257.27	1142.56	234.1	2207.85	423.21	5810.5	575.63	366.1	11.03	0.0645676	0.997517	107.76	0.00160051	69.2452	3.36478	3.46587	790.471	0.369586	21.3166
21QSC01-1-05	0.0438	19.04	0.112	1.83	4.23	1.893	26.16	10.18	125.54	51.13	238.03	50.84	501.92	102.16	5169.73	95.59	72.21	13.89	0.00389086	0.997271	20.6009	0.00934228	18.8383	0.201705	10.4044	814.598	0.550155	92.7591
21QSC01-1-06	<0.32	54.11	<0.140	2.95	9.93	2.86	50.73	18.39	216.55	82.04	358.27	73.94	706.66	138.23	6502.74	668.06	203.75	12	0.00915171	0.992036	68.534	0.571041	53.6344	0.475637	18.3424	799.166	0.389567	112.076
21QSC01-1-07	24.68	105.34	8.85	49.61	25.09	8.46	83.8	26.41	291.79	109.87	487.6	102.92	1006.08	203.38	6365.82	328.9	216.55	11.15	0.156278	0.985468	63.3409	0.000106147	97.3357	8.00432	2.12336	791.579	0.564055	12.7771
21QSC01-1-08	0.0171	31.36	0.101	2.03	5.64	3.48	41.57	16.83	218.16	90.65	421.53	90.88	893.14	184.58	6859.16	231.81	156.62	13.99	0.003765	0.99593	45.597	0.000124067	31.164	0.19605	15.4483	815.366	0.694822	157.887
21QSC01-1-09	0.686	25.04	0.324	3.85	7.39	3.13	41.1	15.33	188.39	75.2	353.67	74.15	734.78	151.87	6773.21	144.35	137.21	9.52	0.00872553	0.99824	37.5454	0.0570212	24.5854	0.454603	6.5039	775.616	0.549066	54.3974
21QSC01-1-10	0.0042	17.2	0.0756	1.49	3.15	1.25	20.12	7.87	102.61	43.09	206.11	45.4	462.43	95.5	7236.4	104.33	106.92	7.19	0.00268721	0.998431	28.86	0.0765601	17.0598	0.140175	11.5436	748.414	0.480026	121.329
21QSC01-1-11	0.0204	32.87	0.104	2.23	4.94	1.924	31.71	12.61	162.17	66.82	318.14	67.61	664.55	132.09	6491.81	235.26	151.04	12.12	0.00435491	0.997184	44.382	0.00101273	32.6435	0.22654	14.7399	800.202	0.469967	143.073
21QSC01-1-12	0.242	5.51	0.0903	1.18	1.84	0.756	10.34	3.64	47.96	19.24	92.9	20.86	214.97	47.27	5344.14	40.63	44.49	26.4	0.0022725	0.999004	11.8652	0.0942832	5.39115	0.118853	4.66949	887.964	0.529878	45.9604
21QSC01-1-13	0.0225	16.14	0.083	1.47	3.14	1.024	17.96	7.03	90.12	35.68	166.88	36.47	358.17	73.33	7966.89	76.78	56.99	13.49	0.00309502	0.998013	16.3107	0.0070465	15.9798	0.160246	10.9796	811.48	0.416875	98.8497
21QSC01-1-14	3.83	49.54	1.594	10.68	15.05	3.9	86.85	36.56	474	189.22	868.71	180.6	1705.66	320.3	8630.85	589.66	439.1	6.12	0.0218679	0.995303	125.598	0.00745016	48.3948	1.14522	4.63858	733.427	0.329788	42.9422
21QSC01-1-15	0.0099	55.24	0.157	2.72	6.97	3.03	45.35	18.06	237.56	92.81	427.41	90.34	899.04	179.21	6750.6	466.35	240.48	15.12	0.00566728	0.99594	73.5317	0.0583335	54.9453	0.294743	20.3088	823.755	0.521028	184.763
21QSC01-1-16	0.0044	16.91	0.0843	1.53	4	1.388	24.52	9.86	130.69	53.04	253.69	56.22	569.08	117.47	7782.47	87.28	99.22	5.72	0.00287577	0.998004	26.2821	0.104384	16.7601	0.149878	11.0523	727.27	0.428472	111.462
21QSC01-1-18	1.788	34.33	1.154	13.01	18.31	7.67	73.58	23.9	270.02	98.36	430.26	90.01	868.59	175.6	6315.48	161.47	106.32	22.06	0.0443341	0.999142	31.0983	0.000104999	32.0368	2.29318	2.63874	866.468	0.638844	14.6782
21QSC01-1-19	<0.0132	31.13	0.128	2.22	5.01	2.5	36.44	14.89	191.43	78.6	376.69	83.62	828.09	170.16	7144	174.59	146.16	13.49	0.00388022	0.997302	40.9274	0.0273999	30.9282	0.201769	14.0225	811.48	0.56566	152.075
21QSC01-1-20	0.292	54.89	0.857	13.2	23.58	9.75	101.79	34.34	386.91	143.36	635.37	132.48	1281.8	256.84	6740.95	335.48	198.19	10.51	0.0431553	0.998298	59.1229	0.0114271	52.6518	2.23823	4.15833	785.552	0.60842	24.1098
21QSC01-1-21	26.36	85.94	5.89	23.04	13.43	3	81.27	36.96	515.27	208.54	996.47	216.1	2121.94	408.79	8723.06	279.08	399.91	8.5	0.0332805	0.983375	84.919	0.0372466	84.2173	1.72271	3.73003	764.461	0.277614	48.9486
21QSC01-1-22	0.0304	18.46	0.069	1.77	5.07	1.449	26.16	10.08	129.15	50.02	233.76	52.05	506.4	100.55	8322.35	95.12	88.62	5.59	0.00416208	0.997076	25.2107	0.0803453	18.2434	0.216559	10.4294	725.194	0.384653	84.0731
21QSC01-1-23	7.3	25.71	1.045	4.77	4.79	1.927	23.73	8.69	109.46	44.03	206.65	44.76	448.71	93.03	6645.67	99	112.03	21.25	0.00994493	0.995948	27.9272	0.0558085	25.1943	0.515674	5.38994	862.09	0.552572	49.0045
21QSC01-1-24	0.245	25.36	0.221	3.18	5.88	1.804	36.57	15.04	197.95	80.98	385.66	83.34	830.46	169.99	7833.01	134.71	164.64	7.6	0.00576658	0.997718	38.9507	0.0487143	25.0595	0.300506	7.97484	753.676	0.376105	83.3617
21QSC01-1-25	0.0335	21.17	0.096	1.21	3.99	1.865	25.12	10.39	135.87	56.17	268.82	59.13	584.47	118.89	6668.73	102.68	104.44	10.7	0.00231571	0.996518	27.9913	0.0678835	21.0496	0.120424	17.4959	787.372	0.569516	173.29
21QSC01-1-26	20.15	89.77	6.44	31.96	11.98	2.74	46.37	16.56	209.64	82.51	382.15	81.88	807.27	163.37	7400.8	306	216.99	10.11	0.0687803	0.971316	74.3047	0.142783	86.2213	3.5487	2.80882	781.633	0.355408	24.7402
21QSC01-1-27	2.304	28.09	0.793	5.05	4.07	1.432	21.73	8.56	110.37	45.85	218.94	47.62	476.19	98.01	7441.19	108.56	103.73	20.58	0.00890132	0.991888	29.0069	0.0764844	27.6289	0.461111	5.56238	858.368	0.465521	59.8182
21QSC01-1-28	0.613	13.65	0.229	2.54	4.14	2.087	20.86	7.46	93.62	38.83	187.37	41.98	432.96	93.1	6790.18	115.87	104.8	107.09	0.00518018	0.999324	30.4198	0.0851886	13.379	0.271002	5.37402	1088.18	0.686576	49.9487
21QSC01-1-29	0.123	40.89	0.225	4.03	8.13	3.23	50.19	18.44	228.27	88.4	403.01	85.51	837.28	169.19	6505.2	276.78	170.13	10.82	0.00937171	0.997008	309.007	0.960969	40.3968	0.49318	10.1464	788.508	0.488846	82.7055
21QSC01-1-30	18.88	72.14	6.05	30.94	11.6	3.25	40.64	14.73	184.46	74.23	345.24	74.57	736.82	150.93	6831.02	168.13	128.54	21.75	0.0669404	0.968981	264.351	0.968072	68.6259	3.51407	2.33161	864.808	0.457616	20.4279
21QSC02-1-01	0.074	77.74	0.787	13.23	22.49	4.62	111.16	37.87	485.01	172.28	763.82	156.77	1403.27	261.23	8244.39	475.84	289.02	8.06	0.0406435	0.99553	454.695	0.969048	75.6026	2.13739	5.87604	759.311	0.282486	36.2568
21QSC02-1-02	0.0558	43.35	0.625	8.7	15.91	5.23	78.63	25.61	314.75	114.78	520.8	108.09	982.95	198.28	7961.63	372.83	203.72	8.78	0.0265275	0.99718	382.143	0.94949	41.9535	1.39655	4.98276	767.627	0.45206	30.9762
21QSC02-1-03	8.85	49.34	3.54	19.66	11.54	3.57	57.15	19.15	249.71	95.63	454.64	98.26	921.29	192.04	7331.64	238.12	206.88	8.99	0.0420808	0.98771	339.779	0.985216	47.1259	2.21414	2.50966	769.948	0.424992	22.2254
21QSC02-1-04	0.137	16.29	0.094	1.27	2.62	0.98	17.18	6.54	90.41	37.59	188.86	42.13	411.15	88.7	8269.07	68.85	83.6	7.96	0.00212631	0.99861	215.357	0.978643	16.178	0.112014	12.8268	758.108	0.446568	145.221
21QSC02-1-05	0.57	149.73	0.661	10.81	22.36	5.14	125.45	45.06	591.31	226.18	1057.45	219.61	1973.18	386.75	7083.52	1276.65	596.61	8.42	0.0268746	0.996091	636.332	0.978501	148.318	1.41151	13.8511	763.541	0.296699	105.61
21QSC02-1-06	7.23	57.37	2.98	15.88	9.59	2.15	52.58	21.04	315.47	132.04	658.27	145.72	1423.27	287.44	9750.68	291.28	441.5	5.27	0.0224746	0.983641	517.968	0.999185	56.1868	1.18321	3.61272	719.907	0.292713	48.3869
21QSC02-1-07	0.351	40.69	0.262	3.31	8.31	2.48	56.22	22.17	311.25	123.29	595.84	126.73	1193.32	245.94	9289.22	494.48	417.33	8.79	0.0062302	0.996331	546.653	0.994009	40.3618	0.328215	12.2931	767.739	0.350776	123.8
21QSC02-1-08	18.79	114.72	8.94	47.72	24.15	5.81	90.86	29.64	368.58	138.4	642.17	132.56	1247.37	251.86	8079.03	596.04	369.28	9.37	0.127494	0.984141	507.262	0.979045	108.021	6.69881	2.40402	774.039	0.379188	17.0563
21QSC02-1-09	0.0117	10.9	0.144	3.3	5.82	2.53	29.55	9.42	122.79	48.47	231.85	49.6	483.57	105.27	6253	82.75	79.25	13.5	0.00790792	0.999266	190.462	0.972041	10.4833	0.416748	3.30303	811.558	0.589799	26.1276
21QSC02-1-10	0.0574	31.37	0.26	4.78	8.51	3	47.6	16.4	216.18	81.62	385.35	83.92	797.61	165.07	7719.27	214.26	148.8	9.85	0.0110818	0.998359	307.687	0.961991	30.7865	0.58351	6.56276	779.017	0.455697	53.6589
21QSC02-1-11	0.0083	25.5	0.103	2.18	4.92	2.4	34.87	12.78	177.89	72.41	348.31	74.52	702.53	151.93	7072.84	128.39	104.23	13.23	0.00404198	0.997129	239.463	0.965899	25.2872	0.212808	11.6972	809.413	0.560178	119.586
21QSC02-1-12	4.77	44.02	1.768	9.73	8.79	2.36	50.43	18.3	247.76	99.67	486.2	104.35	966.01	199.93	9245.54	279.52	225.86	8.07	0.0182062	0.993617	403.83	0.978061	43.0615	0.95853	4.52415	759.43	0.342686	45.8317
21QSC02-1-13	0.0139	32.05	0.153	2.47	5.45	2.65	38.64	15.06	208.86	84.24	405.18	86.24	823.1	174.4	6959.04	169.4	130.68	14.66	0.00444484	0.996838	268.589	0.968605	31.816	0.233961	12.9757	820.403	0.558281	136.681
21QSC02-1-14	0.0164	47.2	0.133	2.54	6.57	2.198	44.7	17.06	233.76	94.81	453.46	96.41	905.64	184.5	7672.79	485.84	307.44	10.66	0.00495719	0.996197	449.194	0.976398	46.939	0.260999	18.5827	786.991	0.392116	180.485
21QSC02-1-15	0.082	12.24	0.0615	0.556	1.38	0.427	8.25	3.16	49.09	22.61	122.31	30.72	338.87	80.13	9500.27	99.21	140.39	6.99	0.000648152	0.999073	291.184	0.990539	12.2058	0.0341661	22.0144	745.758	0.386888	357.965
21QSC02-1-16	0.075	22.39	0.201	3.86	8.08	2.75	43.81	15.26	199.31	76.95	370.42	78.79	773.14	157.58	8264.23	145.55	122.3	13.6	0.00897554	0.998412	278.643	0.968133	21.9172	0.472799	5.80052	812.344	0.446852	47.2856
21QSC02-1-17	0.251	29.8	0.214	3.1	7.59	2.1	46.56	18.04	259.51	110.5	528.11	112	1027.84	211.13	9177.36	195.89	232.34	7.95	0.00577619	0.996764	380.632	0.994016	29.4957	0.304276	9.6129	757.987	0.34152	97.7937
21QSC02-1-18	0.254	2.138	0.0064	0.284	0.338	0.177	1.6	0.712	9.31	3.97	21.48	5.4	56.33	11.53	5513.63	24.57	71.95	56.74	0.00039312	0.994219	139.122	0.99976	2.11727	0.0207331	7.52817	989.424	0.735832	103.09
21QSC02-1-19	0.0326	31.93	0.268	4.97	9.58	2.45	43.83	14.77	188.58	71.88	333.05	70.17	660.04	130.95	5723.63	165.15	101.32	13.66	0.0137725	0.998206	223.561	0.949658	31.2054	0.724646	6.42455	812.814	0.365528	43.9463
21QSC02-1-20	0.0296	28	0.334	5.52	11.11	4.87	56.75	18.55	228.42	85.85	405.82	84.58	784.28	163.74	7530.9	153.66	106.65	9.85	0.0154284	0.997865	257.138	0.953954	27.1877	0.812298	5.07246	779.017	0.592943	34.401
