# Supplementary material for: Identification of the early cretaceous granitic pluton and tectonic implications in the middle gangdese belt, southern tibet
Source: Frontiers journal article supplement (doi:10.3389/feart.2022.979313), 2022-09-07
Supplement: Table_6.XLS [file Table_6.XLS]

## Sheet: Sheet1
Supplementary Table6 Calculated Crustal thickness of the studied area
	Ce	Y	Sr	La	Yb	H1/km	H2/km
21QSC01-9	52.7551	22.2891	123.801	27.0947	2.30531	37.1102	31.9314
21QSC01-10	52.3741	21.6893	151.354	26.8572	2.33211	37.4718	32.8855
21QSC02-4	54.7808	22.9162	135.234	28.1001	2.42693	37.2895	32.1638
21QSC02-5	54.6004	22.2954	132.385	28.0544	2.36459	37.7257	32.1883
21QSC01-4	53.7001	22.7401	119.55	27.8141	2.43601	37.0691	31.7324
21QSC01-5	53.562	23.2574	156.625	27.5706	2.48201	36.6166	32.7221
21QSC01-6	54.4118	22.9266	129.551	27.7727	2.51225	37.1593	31.996
21QSC01-7	54.4511	22.8376	135.855	27.8654	2.47378	37.2425	32.1957
Langxian Early Cretaceous granite (120Ma)	25.4	12	500	13	1.32	35.0936	56.1267
	23.6	13	488	11.3	1.49	32.322	53.3608
Notes:Early Cretaceous in Langxian data after Wang et al., (2013).
